# Supplementary material for: Altered function and maturation of primary cortical neurons from a 22q11.2 deletion mouse model of schizophrenia
Source: PubMed Central journal article supplement (PMC5904157; doi:10.1038/s41398-018-0132-8), 2018-04-18
Supplement: 41398_2018_132_MOESM6_ESM.pdf [file 41398_2018_132_MOESM6_ESM.pdf]

Supplementary Table S1: Quantification data of synaptic activities.

Table S1A: sEPSC

| Time  | Genotype           | Frequency    | p-value  | Amplitude    | p-value | Rise        | p-value  | Decay       | p-value |
|-------|--------------------|--------------|----------|--------------|---------|-------------|----------|-------------|---------|
| DIV7  | WT (n = 18 )       | 4.24 ± 0.24  | 0.518603 | 29.52 ± 1.37 | 0.8381  | 2.81 ± 0.08 | 0.327289 | 4.42 ± 0.37 | 0.17362 |
|       | Df(16)A+/- (n =17) | 4.57 ± 0.45  |          | 29.98 ± 1.74 |         | 2.67 ± 0.11 |          | 3.83 ± 0.21 |         |
| DIV14 | WT (n = 17)        | 10.86 ± 0.25 | 0.463525 | 33.83 ± 3.67 | 0.61329 | 2.74 ± 0.09 | 0.786388 | 5.88 ± 0.34 | 0.06945 |
|       | Df(16)A+/- (n =14) | 11.56 ± 1.01 |          | 31.26 ± 3.28 |         | 2.78 ± 0.16 |          | 4.81 ± 0.37 |         |

Table S1B: mEPSC

| Time  | Genotype            | Frequency   | p-value  | Amplitude    | p-value | Rise        | p-value  | Decay       | p-value |
|-------|---------------------|-------------|----------|--------------|---------|-------------|----------|-------------|---------|
| DIV7  | WT (n = 17)         | 3.32 ± 0.44 | 0.331769 | 19.99 ± 2.11 | 0.90242 | 1.91 ± 0.15 | 0.239713 | 2.46 ± 0.35 | 0.50384 |
|       | Df(16)A+/- (n = 19) | 2.75 ± 0.37 |          | 19.61 ± 2.44 |         | 2.19 ± 0.17 |          | 2.76 ± 0.29 |         |
| DIV14 | WT (n = 7)          | 9.74 ± 2.79 | 0.634158 | 19.32 ± 3.01 | 0.67871 | 2.15 ± 0.25 | 0.545745 | 2.98 ± 0.46 | 0.06538 |
|       | Df(16)A+/- (n = 8)  | 8.19 ± 1.81 |          | 17.78 ± 2.21 |         | 2.34 ± 0.19 |          | 1.96 ± 0.27 |         |

Table S1C: sIPSC

| Time  | Genotype            | Frequency   | p-value  | Amplitude    | p-value | Rise        | p-value  | Decay        | p-value |
|-------|---------------------|-------------|----------|--------------|---------|-------------|----------|--------------|---------|
| DIV7  | WT (n = 16)         | 0.33 ± 0.03 | 0.021361 | 23.27 ± 1.95 | 0.67658 | 4.33 ± 0.36 | 0.546525 | 12.12 ± 0.63 | 0.24129 |
|       | Df(16)A+/- (n = 15) | 0.49 ± 0.05 |          | 22.19 ± 1.64 |         | 4.65 ± 0.39 |          | 13.33 ± 0.79 |         |
| DIV14 | WT (n = 17)         | 1.23 ± 0.18 | 0.085309 | 31.16 ± 3.41 | 0.58668 | 4.93 ± 0.49 | 0.951298 | 11.84 ± 1.78 | 0.49087 |
|       | Df(16)A+/- (n = 17) | 1.65 ± 0.16 |          | 28.96 ± 2.12 |         | 4.97 ± 0.46 |          | 13.43 ± 1.43 |         |

Table S1D: mIPSC

| Time  | Genotype            | Frequency   | p-value  | Amplitude    | p-value | Rise        | p-value  | Decay        | p-value |
|-------|---------------------|-------------|----------|--------------|---------|-------------|----------|--------------|---------|
| DIV7  | WT (n = 11)         | 0.29 ± 0.09 | 0.302667 | 16.61 ± 1.64 | 0.52422 | 2.09 ± 0.12 | 0.137232 | 11.84 ± 1.19 | 0.23063 |
|       | Df(16)A+/- (n = 12) | 0.45 ± 0.12 |          | 15.42 ± 0.99 |         | 2.33 ± 0.11 |          | 13.49 ± 0.73 |         |
| DIV14 | WT (n = 8 )         | 1.08 ± 0.19 | 0.535187 | 16.48 ± 0.86 | 0.01377 | 2.02 ± 0.03 | 0.462422 | 13.04 ± 0.46 | 0.76004 |
|       | Df(16)A+/- (n = 10) | 1.31 ± 0.28 |          | 20.97 ± 1.28 |         | 2.06 ± 0.04 |          | 12.78 ± 0.63 |         |
