# Supplementary material for: Altered function and maturation of primary cortical neurons from a 22q11.2 deletion mouse model of schizophrenia
Source: PubMed Central journal article supplement (PMC5904157; doi:10.1038/s41398-018-0132-8), 2018-04-18
Supplement: 41398_2018_132_MOESM7_ESM.pdf [file 41398_2018_132_MOESM7_ESM.pdf]

**Supplementary Table S2: Quantification data of calcium imaging (DIV7).**

| Genotype   | KCl Treatment | Variable           | n cells | Mean     | Median  | SD       | SE       | P value    |
|------------|---------------|--------------------|---------|----------|---------|----------|----------|------------|
| WT         | 2s            | Baseline_intensity | 63      | 0.620357 | 0.6135  | 0.054671 | 0.006888 | 0.67       |
| Df(16)A+/- |               |                    | 38      | 0.625105 | 0.61875 | 0.054758 | 0.008883 |            |
| WT         |               | Percent_change_max | 63      | 110.9841 | 88      | 72.4031  | 9.121934 | 0.03       |
| Df(16)A+/- |               |                    | 38      | 83.13158 | 67.5    | 53.98707 | 8.757859 |            |
| WT         |               | Area_Under_curve   | 63      | 52.363   | 51.122  | 6.315742 | 0.795709 | 0.027      |
| Df(16)A+/- |               |                    | 38      | 49.95768 | 49.5745 | 4.412177 | 0.71575  |            |
| WT         |               | Tau_s              | 63      | 5.44741  | 4.619   | 3.201851 | 0.403395 | 0.083      |
| Df(16)A+/- |               |                    | 37      | 6.460703 | 6.5641  | 2.518722 | 0.414075 |            |
|            |               |                    |         |          |         |          |          |            |
| WT         | 5s            | Baseline_intensity | 63      | 0.622762 | 0.6155  | 0.053279 | 0.006713 | 0.86       |
| Df(16)A+/- |               |                    | 38      | 0.620803 | 0.61    | 0.054463 | 0.008835 |            |
| WT         |               | Percent_change_max | 63      | 155.0952 | 159     | 58.36695 | 7.353544 | 0.77       |
| Df(16)A+/- |               |                    | 38      | 151.4211 | 143.5   | 62.08566 | 10.07162 |            |
| WT         |               | Area_Under_curve   | 63      | 64.4271  | 63.341  | 11.1037  | 1.398934 | 0.00000011 |
| Df(16)A+/- |               |                    | 38      | 54.58287 | 53.996  | 6.177638 | 1.002145 |            |
| WT         |               | Tau_s              | 58      | 6.962998 | 5.7394  | 4.509553 | 0.592133 | 0.55       |
| Df(16)A+/- |               |                    | 37      | 6.402405 | 5.2309  | 4.310545 | 0.708649 |            |
|            |               |                    |         |          |         |          |          |            |
| WT         | 10s           | Baseline_intensity | 63      | 0.622405 | 0.6095  | 0.056475 | 0.007115 | 0.7        |
| Df(16)A+/- |               |                    | 38      | 0.627842 | 0.608   | 0.074203 | 0.012037 |            |
| WT         |               | Percent_change_max | 63      | 154.4762 | 162     | 47.50683 | 5.985298 | 0.69       |
| Df(16)A+/- |               |                    | 38      | 158.7368 | 171.5   | 54.59467 | 8.856424 |            |
| WT         |               | Area_Under_curve   | 63      | 68.28151 | 64.685  | 12.97799 | 1.635073 | 0.00039    |
| Df(16)A+/- |               |                    | 38      | 60.99766 | 61.488  | 6.917156 | 1.122111 |            |
| WT         |               | Tau_s              | 52      | 7.85469  | 6.619   | 4.82183  | 0.668667 | 0.082      |
| Df(16)A+/- |               |                    | 36      | 6.42665  | 5.7212  | 2.760673 | 0.460112 |            |
