# Supplementary material for: Altered function and maturation of primary cortical neurons from a 22q11.2 deletion mouse model of schizophrenia
Source: PubMed Central journal article supplement (PMC5904157; doi:10.1038/s41398-018-0132-8), 2018-04-18
Supplement: 41398_2018_132_MOESM8_ESM.pdf [file 41398_2018_132_MOESM8_ESM.pdf]

**Supplementary Table S3: Quantification data of calcium imaging (DIV14).**

| Genotype   | KCl Treatment | Variable           | n cells | Mean     | Median  | SD       | SE       | P value  |
|------------|---------------|--------------------|---------|----------|---------|----------|----------|----------|
| WT         | 2s            | Baseline_intensity | 74      | 0.651959 | 0.62975 | 0.080011 | 0.009301 | 0.83     |
| Df(16)A+/- |               |                    | 56      | 0.654777 | 0.63925 | 0.070695 | 0.009447 |          |
| WT         |               | Percent_change_max | 74      | 222.9865 | 229     | 56.20327 | 6.533498 | 0.00054  |
| Df(16)A+/- |               |                    | 56      | 189.6071 | 184     | 50.54383 | 6.754204 |          |
| WT         |               | Area_Under_curve   | 74      | 51.59543 | 53.122  | 11.39124 | 1.324205 | 0.16     |
| Df(16)A+/- |               |                    | 56      | 49.57332 | 49.557  | 3.734037 | 0.498982 |          |
| WT         |               | Tau_s_2            | 66      | 3.472858 | 3.057   | 1.587852 | 0.195451 | 0.007    |
| Df(16)A+/- |               |                    | 52      | 2.81364  | 2.54625 | 1.002918 | 0.13908  |          |
|            |               |                    |         |          |         |          |          |          |
| WT         | 5s            | Baseline_intensity | 74      | 0.65575  | 0.63275 | 0.07866  | 0.009144 | 0.0019   |
| Df(16)A+/- |               |                    | 56      | 0.619821 | 0.6205  | 0.050202 | 0.006709 |          |
| WT         |               | Percent_change_max | 74      | 219.1351 | 208.5   | 54.8603  | 6.377381 | 0.1      |
| Df(16)A+/- |               |                    | 56      | 204.7143 | 200.5   | 44.36531 | 5.928564 |          |
| WT         |               | Area_Under_curve   | 74      | 64.2453  | 63.2795 | 11.11209 | 1.291754 | 0.000025 |
| Df(16)A+/- |               |                    | 56      | 57.76089 | 57.233  | 5.313298 | 0.710019 |          |
| WT         |               | Tau_s_2            | 66      | 6.090915 | 4.83675 | 4.270713 | 0.525688 | 0.0019   |
| Df(16)A+/- |               |                    | 48      | 4.04811  | 3.18145 | 2.542661 | 0.367002 |          |
|            |               |                    |         |          |         |          |          |          |
| WT         | 10s           | Baseline_intensity | 74      | 0.637716 | 0.6155  | 0.080049 | 0.009306 | 0.0017   |
| Df(16)A+/- |               |                    | 47      | 0.599032 | 0.5975  | 0.052582 | 0.00767  |          |
| WT         |               | Percent_change_max | 74      | 205.3108 | 201.5   | 39.43919 | 4.584713 | 0.007    |
| Df(16)A+/- |               |                    | 47      | 185.3404 | 182     | 38.49409 | 5.614939 |          |
| WT         |               | Area_Under_curve   | 74      | 70.35988 | 67.97   | 11.25366 | 1.308211 | 0.000075 |
| Df(16)A+/- |               |                    | 47      | 63.54164 | 62.728  | 7.023169 | 1.024435 |          |
| WT         |               | Tau_s_2            | 63      | 8.135479 | 5.4109  | 6.402471 | 0.806635 | 0.0093   |
| Df(16)A+/- |               |                    | 42      | 5.237076 | 3.74025 | 4.783381 | 0.738092 |          |
