# Supplementary material for: Altered function and maturation of primary cortical neurons from a 22q11.2 deletion mouse model of schizophrenia
Source: PubMed Central journal article supplement (PMC5904157; doi:10.1038/s41398-018-0132-8), 2018-04-18
Supplement: 41398_2018_132_MOESM11_ESM.pdf [file 41398_2018_132_MOESM11_ESM.pdf]

**Supplementary Table S6: Expression profile of potassium leak channels, two pore domain subfamily K (KCNK), in Df(16)A+/- cortical neurons.**

| <b>GeneSymbol</b> | <b>baseMean</b> | <b>log2FoldChange</b> | <b>lfcSE</b> | <b>stat</b>  | <b>P value</b> | <b>padj</b> |
|-------------------|-----------------|-----------------------|--------------|--------------|----------------|-------------|
| <i>Kcnk1</i>      | 1010.952035     | -0.468751948          | 0.170524104  | -2.748889672 | 0.005979751    | 0.054232    |
| <i>Kcnk2</i>      | 1426.992376     | -0.276395165          | 0.102909831  | -2.685799429 | 0.007235651    | 0.06252     |
| <i>Kcnk3</i>      | 476.4185786     | 0.214075715           | 0.073491652  | 2.912925606  | 0.003580599    | 0.037541    |
| <i>Kcnk4</i>      | 48.14588845     | 0.1771375             | 0.189506013  | 0.93473287   | 0.349925983    | 0.624438    |
| <i>Kcnk5</i>      | 15.77097643     | -0.709757518          | 0.259426535  | -2.735870945 | 0.006221542    | 0.055796    |
| <i>Kcnk6</i>      | 4.186742753     | -0.351979418          | 0.28934272   | -1.216479259 | 0.223802407    | NA          |
| <i>Kcnk7</i>      | 1.045604755     | -0.004314639          | 0.226080036  | -0.019084564 | 0.984773645    | NA          |
| <i>Kcnk9</i>      | 916.57136       | 0.321660129           | 0.077561026  | 4.147187656  | 3.37E-05       | 0.000943    |
| <i>Kcnk10</i>     | 609.9467234     | -0.148696939          | 0.103836513  | -1.432029393 | 0.152135409    | 0.410082    |
| <i>Kcnk12</i>     | 102.3069837     | 0.062103338           | 0.189123358  | 0.328374763  | 0.742628322    | 0.89249     |
| <i>Kcnk13</i>     | 78.8904367      | 0.109694079           | 0.200298155  | 0.547653964  | 0.583929528    | 0.801754    |
| <i>Kcnk15</i>     | 0.758133188     | -0.193293118          | 0.200489304  | -0.964106887 | 0.33499234     | NA          |
| <i>Kcnk16</i>     | 0 NA            | NA                    | NA           | NA           | NA             | NA          |
| <i>Kcnk18</i>     | 0.658011244     | -0.283674467          | 0.199207377  | -1.424015872 | 0.154441878    | NA          |
