# Supplementary material for: Altered function and maturation of primary cortical neurons from a 22q11.2 deletion mouse model of schizophrenia
Source: PubMed Central journal article supplement (PMC5904157; doi:10.1038/s41398-018-0132-8), 2018-04-18
Supplement: 41398_2018_132_MOESM12_ESM.pdf [file 41398_2018_132_MOESM12_ESM.pdf]

**Supplementary Table S7: Expression profile of voltage-gated sodium and potassium channels in Df(16)A+/- cortical neurons.**

**Sodium channels, voltage gated (SCN)**

| GeneSymbol    | baseMean  | log2FoldChange | lfcSE    | stat     | P value  | padj     |
|---------------|-----------|----------------|----------|----------|----------|----------|
| <i>Scn1a</i>  | 2839.5863 | 0.129366036    | 0.131179 | 0.986178 | 0.324046 | 0.599771 |
| <i>Scn1b</i>  | 1152.5285 | 0.315664607    | 0.135027 | 2.337781 | 0.019399 | 0.121791 |
| <i>Scn2a1</i> | 4532.102  | 0.160934687    | 0.062243 | 2.585602 | 0.009721 | 0.077444 |
| <i>Scn2b</i>  | 748.87013 | 0.446569862    | 0.091685 | 4.870685 | 1.11E-06 | 6.93E-05 |
| <i>Scn3a</i>  | 2031.3436 | 0.12620778     | 0.079633 | 1.584866 | 0.112997 | 0.349069 |
| <i>Scn3b</i>  | 4264.859  | 0.211112433    | 0.111197 | 1.885438 | 0.059371 | 0.241905 |
| <i>Scn4a</i>  | 0.6512144 | 0.060686914    | 0.169408 | 0.358229 | 0.720172 | NA       |
| <i>Scn4b</i>  | 19.430738 | -0.126209552   | 0.236981 | -0.53257 | 0.59433  | 0.808461 |
| <i>Scn5a</i>  | 122.23498 | -1.312606914   | 0.262996 | -4.99097 | 6.01E-07 | 4.26E-05 |
| <i>Scn7a</i>  | 5.9270248 | -0.183031157   | 0.284312 | -0.64377 | 0.519726 | NA       |
| <i>Scn8a</i>  | 3581.5583 | 0.194270496    | 0.063256 | 3.07117  | 0.002132 | 0.025213 |
| <i>Scn9a</i>  | 25.396361 | 0.295392991    | 0.231617 | 1.27535  | 0.202185 | 0.477705 |
| <i>Scn10a</i> | 0.5099092 | -0.05773531    | 0.17809  | -0.32419 | 0.745793 | NA       |
| <i>Scn11a</i> | 6.6006126 | 0.413101327    | 0.283275 | 1.458304 | 0.144757 | NA       |

**Potassium channel, voltage-dependent, Delayed rectifier**

| GeneSymbol    | baseMean  | log2FoldChange | lfcSE    | stat     | P value  | padj     |
|---------------|-----------|----------------|----------|----------|----------|----------|
| <i>Kcna1</i>  | 2211.1322 | 0.073037524    | 0.204809 | 0.356612 | 0.721382 | 0.880049 |
| <i>Kcna2</i>  | 1957.9713 | 0.256404948    | 0.111853 | 2.292333 | 0.021886 | 0.132098 |
| <i>Kcna3</i>  | 278.866   | 0.056898123    | 0.153098 | 0.371646 | 0.710156 | 0.874804 |
| <i>Kcna5</i>  | 56.965172 | 0.176533913    | 0.175853 | 1.003873 | 0.31544  | 0.59186  |
| <i>Kcna6</i>  | 2185.7843 | 0.093480315    | 0.065844 | 1.419721 | 0.155689 | 0.415829 |
| <i>Kcna7</i>  | 2.6051406 | 0.000517386    | 0.276858 | 0.001869 | 0.998509 | NA       |
| <i>Kcna10</i> | 1.0711445 | -0.032012019   | 0.225717 | -0.14182 | 0.887219 | NA       |
| <i>Kcnb1</i>  | 1673.6636 | 0.100046868    | 0.061233 | 1.633876 | 0.102285 | 0.330038 |
| <i>Kcnb2</i>  | 222.87871 | -0.019377674   | 0.118973 | -0.16287 | 0.870618 | 0.946729 |
| <i>Kcnc1</i>  | 2136.3368 | 0.02129239     | 0.070193 | 0.303339 | 0.761632 | 0.900029 |
| <i>Kcnc2</i>  | 968.51837 | 0.447671696    | 0.1482   | 3.020717 | 0.002522 | 0.028861 |
| <i>Kcnq1</i>  | 4.2364629 | 0.077521109    | 0.289233 | 0.268023 | 0.788681 | NA       |
| <i>Kcnq2</i>  | 3121.4387 | 0.184016322    | 0.073583 | 2.500794 | 0.012392 | 0.091384 |
| <i>Kcnq3</i>  | 303.29361 | 0.189940697    | 0.118686 | 1.600364 | 0.109518 | 0.342789 |
| <i>Kcnq4</i>  | 178.47542 | 0.082029269    | 0.119621 | 0.685742 | 0.492876 | 0.741306 |
| <i>Kcnq5</i>  | 3196.8921 | 0.057383551    | 0.06007  | 0.955273 | 0.339439 | 0.615266 |
| <i>Kcnh1</i>  | 889.42251 | 0.155243982    | 0.102582 | 1.513368 | 0.130186 | 0.378029 |
