# Supplementary material for: Altered function and maturation of primary cortical neurons from a 22q11.2 deletion mouse model of schizophrenia
Source: PubMed Central journal article supplement (PMC5904157; doi:10.1038/s41398-018-0132-8), 2018-04-18
Supplement: 41398_2018_132_MOESM13_ESM.pdf [file 41398_2018_132_MOESM13_ESM.pdf]

**Supplementary Table S8. Expression profile of ATPase in Df(16)A+/- cortical neurons.**

| <b>GeneSymbol</b> | <b>baseMean</b> | <b>log2FoldChange</b> | <b>lfcSE</b> | <b>stat</b> | <b>pvalue</b> | <b>padj</b> |
|-------------------|-----------------|-----------------------|--------------|-------------|---------------|-------------|
| <i>Atp1a2</i>     | 4678.399459     | 0.705926306           | 0.105470105  | 6.69314119  | 2.18E-11      | 1.01E-08    |
| <i>Atp13a4</i>    | 26.74084902     | 0.907026638           | 0.174394061  | 5.20101792  | 1.98E-07      | 2.10E-05    |
| <i>Atp6v0e</i>    | 464.8403415     | -0.31903324           | 0.078146648  | -4.0824943  | 4.46E-05      | 0.001354    |
| <i>Atp6v1e1</i>   | 4804.202585     | 0.092187624           | 0.031851201  | 2.89432172  | 0.0038        | 0.04367     |
| <i>Atp10a</i>     | 233.4278127     | -0.35011336           | 0.11209071   | -3.1234823  | 0.001787      | 0.021837    |
| <i>Atp2b2</i>     | 6106.021849     | 0.216019607           | 0.069692229  | 3.0996226   | 0.001938      | 0.02337     |
| <i>Atp6v0a1</i>   | 10627.23312     | 0.153180663           | 0.051482581  | 2.97538817  | 0.002926      | 0.03219     |
| <i>Atp7b</i>      | 221.3225009     | -0.63156702           | 0.219770473  | -2.8737574  | 0.004056      | 0.040682    |
| <i>Atp6v1a</i>    | 13080.98748     | 0.112066107           | 0.039880476  | 2.81004939  | 0.004953      | 0.04701     |
